1 **Four decades of plant community change along a continental**  
2 **gradient of warming**

---

3 Antoine Becker-Scarpitta\*<sup>1</sup>, Steve Vissault<sup>1</sup>, Mark Vellend<sup>1</sup>

4 1: Université de Sherbrooke, Département de biologie, 2500 boulevard de  
5 l'Université, Sherbrooke, J1K 2R1, Québec, Canada.

6 **ORCID:** Becker-Scarpitta: 0000-0001-9241-091X

7 **Contact: \*Corresponding author:** Antoine Becker-Scarpitta:

8 antoine.becker.scarpitta@gmail.com

9 Steve Vissault: steve.vissault@usherbrooke.ca

10 Mark Vellend: mark.vellend@usherbrooke.ca

11 **Contribution:** ABS and MV designed the study and wrote the manuscript collaboratively  
12 (with ABS as leader); ABS collected and analyzed the data; SV extracted climatic and  
13 species distribution data and provided input on the manuscript.

14 **Keywords:** biodiversity, climate changes, community ecology, forest, historical ecology,  
15 legacy data, long-term monitoring, plant community, resurvey, understorey vegetation.

16 **Paper type:** Primary Research Article

17        **Abstract**

18        Many studies of individual sites have revealed biotic changes consistent with climate  
19        warming (e.g., upward elevational distribution shifts), but our understanding of the  
20        tremendous variation among studies in the magnitude of such biotic changes is minimal.  
21        In this study we re-surveyed forest vegetation plots 40 years after the initial surveys in  
22        three protected areas along a west-to-east gradient of increasingly steep recent warming  
23        trends in eastern Canada (Québec). Consistent with the hypothesis that climate warming  
24        has been an important driver of vegetation change, we found an increasing magnitude of  
25        changes in species richness and composition from west to east among the three parks.  
26        For the two mountainous parks, we found no changes in elevational species' distributions  
27        in the eastern most park where warming has been minimal (Forillon Park), and significant  
28        upward distribution shifts in the centrally located park where the recent warming trend  
29        has been marked (Mont-Mégantic). Community temperature indices (CTI), reflecting the  
30        average affinities of locally co-occurring to temperature conditions across their  
31        geographic ranges ("species temperature indices"), did not change over time as predicted.  
32        However, close examination of the underpinnings of CTI values suggested a high  
33        sensitivity to uncertainty in individual species' temperature indices, and so a potentially  
34        limited responsiveness to warming. Overall, by testing *a priori* predictions concerning  
35        variation among parks in the direction and magnitude of vegetation changes, we have  
36        provided stronger evidence for a link between climate warming and biotic responses than  
37        otherwise possible, and provided a potential explanation for large variation among studies  
38        in warming-related biotic changes.

## 39 Introduction

40 Climate is a dominant driver of large-scale plant distributions (Pearson & Dawson, 2003).  
41 On smaller spatial and temporal scales, changes in local climatic conditions can lead to  
42 modifications of species' abundances (Vellend *et al.*, 2017), risks of extinction (Parmesan  
43 & Yohe, 2003; Rooney *et al.*, 2004; Urban, 2015), phenology (Menzel *et al.*, 2006;  
44 Cleland *et al.*, 2007), distributions (Kelly & Goulden, 2008; Lenoir *et al.*, 2008; Bertrand  
45 *et al.*, 2011) and local adaptation (Aitken *et al.*, 2008). Although many such changes have  
46 been observed in previous studies, the magnitude of response varies tremendously from  
47 study to study, and we have only a limited understanding of the processes underlying this  
48 variation.

49 Most of the world's natural vegetation is dominated by long-lived perennials plants  
50 (Grime, 1977), and so we expect vegetation responses to environmental change to occur  
51 slowly relative to the time span of a few years (or less) typical of ecological studies  
52 (Tilman, 1989). A key strategy used to assess longer-term temporal changes in plant  
53 communities is the resurvey of plots initially surveyed decades ago, often referred to as  
54 "legacy" studies (Vellend *et al.*, 2013a; Chytrý *et al.*, 2014; Hédli *et al.*, 2017; Perring *et*  
55 *al.*, 2017). An important limitation of such studies is their constrained ability to test the  
56 ecological mechanisms underlying temporal community change. Indeed, most legacy  
57 studies pertain to a single site, meaning a set of plots within an area sharing a similar  
58 climate and history, in which case community change might be caused by many local  
59 changes, such as ongoing land use (Hermý & Verheyen, 2007; Kampichler *et al.*, 2012;  
60 Newbold *et al.*, 2015), historical management legacies (Vanhellemont *et al.*, 2014;

61 Becker *et al.*, 2016; Perring *et al.*, 2017), nitrogen deposition (Becker-Scarpitta *et al.*,  
62 2017) or grazing (Frerker *et al.*, 2014; Vild *et al.*, 2016).

63 Causes of community change at a single site are often assessed by comparing observed  
64 changes in community composition across space or time with predictions based on  
65 drivers of interest, such as the climate warming. For instance, as predicted by the climate  
66 warming hypotheses, many species have experienced a shift in distribution towards  
67 higher elevations (Gottfried *et al.*, 2012; Pauli *et al.*, 2012; Stockli *et al.*, 2012; Sproull *et*  
68 *al.*, 2015) or latitudes (Parmesan *et al.*, 1999; Hickling *et al.*, 2006; Boisvert-Marsh *et al.*,  
69 2014; but see VanDerWal *et al.*, 2012). Given that plant species richness tends to be  
70 greater in warmer areas, a local-scale increase in richness is also predicted due to  
71 warming, at least in the absence of severe moisture stress (Vellend *et al.*, 2017). Finally,  
72 if each species is first characterized by its geographic affinity with different temperature  
73 conditions (using a “Species Temperature Index”), then the average affinity across  
74 species in a local community (the “Community Temperature Index”) is predicted to  
75 increase in response to warming (Devictor *et al.* 2008, 2012). Although there have been  
76 considerable advances in testing these predictions in single-site studies (local scale),  
77 explicit tests of predictions comparing multiple sites (regional scale) are needed to  
78 improve our knowledge and ability to predict biodiversity responses to climate changes  
79 (Verheyen *et al.*, 2017).

80 Here we report analyses of changes in forest plant communities over four decades at three  
81 sites strategically chosen to be in areas covering a range of recent climate warming trends  
82 in eastern North-America (Québec, Canada). To assess temporal changes, we have  
83 revisited sites where botanical legacy data were collected in the 1970s, during the time

84 that many provincial parks were being planned and established in Québec. Plots were  
85 widely distributed throughout each park and were typically placed in mature forest  
86 stands. Since the time of the original surveys, these forests have not experienced any  
87 major anthropogenic disturbances, thus minimizing possible confounding causes of  
88 vegetation change.

89 The province of Québec (Canada) spans >1000 km east-west, over which there is a  
90 marked gradient of warming over the past ~60 years (see Appendix S1 and Yagouti *et al.*,  
91 2008). At the tip of the Gaspé Peninsula, the location of our most easterly site, Forillon  
92 National Park (Fig. 1), warming has been least pronounced, likely due to the climatic  
93 buffering effect of the Atlantic Ocean (see Appendix S1). In contrast, Gatineau Park in  
94 continental western Québec has experienced marked warming, with Mont-Mégantic  
95 Provincial Park in between both geographically and in terms of the magnitude of  
96 warming (Fig. 1 and S1, Yagouti *et al.*, 2008). To the best of our knowledge, no study  
97 has used legacy data to specifically test for contrasting vegetation responses in sites with  
98 variable warming trends (but see Menzel *et al.*, 2006 for phenological responses to  
99 different warming trends).

100 Our core hypothesis is that areas with greater warming will have experienced stronger  
101 vegetation changes than areas with less warming (Chen *et al.*, 2011; Wang *et al.*, 2017).  
102 We take advantage of this unique combination of original studies along a warming  
103 gradient to perform a regional-scale analysis of temporal change of forest plant  
104 communities. Results for Mont-Mégantic, including significant upward elevational  
105 distribution shifts and increased local species richness, were reported in a previous paper  
106 (Savage & Vellend, 2015), to which we here add data for Gatineau Park (stronger

107 warming trend) and Forillon Park (weaker warming trend). We tested the following  
108 specific predictions: (1) Significant upward elevational distribution shifts have occurred  
109 at Mont-Mégantic (already observed) but not at Forillon Park (tested in this paper).  
110 (Elevational variation in Gatineau Park is minimal – insufficient to test for temporal  
111 shifts in species distributions.) The magnitude of (2) the temporal change in species  
112 richness, (3) the temporal change in community composition ( $R^2$  from the “time” effect  
113 in a multivariate analysis), and (4) the temporal change in Community Temperature  
114 Index (CTI) vary in magnitude among parks as follows: Forillon < Mont-Mégantic <  
115 Gatineau.

## 116 **Materials and methods**

### 117 **Study region and sites**

118 We studied vegetation change in three north-temperate forest sites in eastern Canada  
119 (Québec), spanning ~1000 km from Forillon National Park in eastern Québec, to Mont-  
120 Mégantic Provincial Park in central Québec and Gatineau National park in the western  
121 part of the province (Fig. 1). For all three parks, there has been no logging or forest  
122 management during the period of study.

123 Forillon National Park, located at the eastern extremity of the Gaspé peninsula (48°54'N,  
124 64°21'W), was created in 1970 and covers 245 km<sup>2</sup>, with our study plots ranging in  
125 elevation from ~50 to 500 m a.s.l. The vegetation at Forillon is characterized in large part  
126 by boreal species, such as *Abies balsamea* (L.) Mill., *Picea glauca* (Moench) Voss and  
127 *Betula papyrifera* Marshall. At low elevation, temperate deciduous or mixed forests are  
128 dominated by *Acer saccharum* Marsh. and *Betula alleghaniensis* Britt. (Majcen, 1981).

129 Mont-Mégantic Provincial Park is located in the Eastern Townships region of Québec  
130 (45°27'N, 71°9'W), about 650 southwest of Forillon Park and 15 km north of the U.S.  
131 borders with New Hampshire and Maine. The park was created in 1994 (logging ceased  
132 in the 1960s prior to park planning) and covers ~55 km<sup>2</sup>. Our study plots range in  
133 elevation between ~460 and 1100 m a.s.l. Vegetation patterns are very similar to Forillon,  
134 with a somewhat more visually evident elevational gradient: at low elevations, temperate  
135 deciduous forests are dominated by *Acer saccharum* Marsh., *Fagus grandifolia* Ehrh. and  
136 *Betula alleghaniensis* Britt., while at high elevation boreal forests are composed largely  
137 of *Abies balsamea* (L.) Mill. and *Picea rubens* Sar. (Marcotte & Grandtner, 1974).

138 Gatineau Park is located in southwestern Québec (45°35'N 76°00'W), in the Outaouais  
139 region, 360 km west of Mont-Mégantic. The park was established in 1938, covers 361  
140 km<sup>2</sup>, with relatively little elevational variation compared to the other parks (250 m  
141 elevational range). Contrary to Forillon and Mont-Mégantic, our vegetation sampling was  
142 not spread throughout the entire park (access to certain sectors of the part is restricted).  
143 Our study area (~30 km<sup>2</sup>) is largely dominated by *Acer saccharum* Marsh and *Fagus*  
144 *grandifolia* Ehrh., with a few more southerly tree species such as *Tilia americana* L.,  
145 *Quercus rubra* L., *Quercus alba* L. or *Fraxinus americana* L. as well.

#### 146 **Data set**

147 All original vegetation surveys were conducted using phytosociological methods  
148 (Marcotte & Grandtner, 1974; Chartrand, 1976; Majcen, 1981). In fixed-area plots (see  
149 below), authors made a full list of vascular plant species in different strata (i.e. canopy  
150 trees, shrubs, herbs) with abundance coefficients per species assigned following the scale

151 of Braun-Blanquet *et al.* (1952). In our analyses, we pooled shrubs and herbs into a single  
152 “understorey” stratum and given the limited representation of the tree community in  
153 smaller plots (90m<sup>2</sup>, see below), we focused all analyses on the understorey data. For  
154 analyses, Braun-Blanquet classes were converted to a percentage value representing the  
155 mid-point of a given abundance class.

156 None of the original survey plots were permanently marked, but for all three parks plot  
157 coordinates were reported in maps and/or tables. As such, plots are considered “semi-  
158 permanent”, which introduces the possibility of pseudo-turnover due to relocation  
159 uncertainty (Stockli *et al.*, 2012; Vellend *et al.*, 2013a; Hédli *et al.*, 2017; Kapfer *et al.*,  
160 2017). However, previous studies have shown that conclusions are robust to uncertainty  
161 in plot relocation, which adds statistical noise but not systematic bias (Kopecký &  
162 Macek, 2015). In our study, original surveyors tended to sample mature forest stands  
163 where spatial heterogeneity was relatively low, thus reducing any effects of plot  
164 relocation uncertainty. We used original plot maps and environmental descriptions  
165 (elevation, slope, aspect) to select potential locations for resurvey plots in a GIS (QGIS  
166 Development Team 2016, Open Source Geospatial Foundation Project). Potential  
167 locations were visited in the field, with the final location of a given plot determined by  
168 the best match to the original location and description. Logistical limitations prevented us  
169 from resurveying all original plots in Forillon and Gatineau. At Mont-Mégantic, all plots  
170 within the current park boundary were surveyed in 2012 (see Savage & Vellend, 2015).  
171 Plot selection for our recent surveys followed several criteria: (i) plots occurred in forest,  
172 excluding swamps or bogs; (ii) plots were accessible via <3-4 hours hiking off of trails  
173 (abandonment of old forest roads and trails since the 1970s has reduced accessibility);



174 (iii) plots had not obviously experienced recent major natural disturbances (e.g., storms,  
175 fire, or insect outbreaks); (iv) in the original survey the plots were sampled in mature  
176 stands that have since maintained forest cover (i.e., no early successional dynamics in the  
177 intervening period).

178 At Forillon, the original survey was conducted in June-September 1972 in 256 vegetation  
179 plots of 500 m<sup>2</sup> distributed throughout the park (Majcen, 1981). We resurveyed 49 plots  
180 during July and August of 2015. At Mont-Mégantic, the vegetation was originally  
181 surveyed in 1970 in 94 plots, almost half of which were outside of the current park  
182 boundaries. The plot size was 400 m<sup>2</sup> in coniferous forest and 800 m<sup>2</sup> in broadleaved  
183 forests (Marcotte & Grandtner, 1974). Among the 94 original plots, 48 were revisited  
184 within the current park limits at Mont-Mégantic in 2012, with results reported in Savage  
185 & Vellend (2015). In Gatineau Park, surveys were conducted in 1973 in 33 plots of 90 m<sup>2</sup>  
186 during the summer in 1973 (Chartrand, 1976) and 28 plots were resurveyed in summer  
187 2016. We harmonized taxonomy across all three parks and two time periods (see below),  
188 so the Mont-Mégantic data are not precisely the same as reported in Savage & Vellend  
189 (2015). The study design was perfectly balanced within parks for statistical analysis (i.e.,  
190 the same number of plots in the original and recent surveys).

## 191 **Taxonomy**

192 Our taxonomical reference for vascular plants was the Taxonomic Name Resolution  
193 Service v4.0 (assessed in Feb 2017: <http://tnrs.iplantcollaborative.org>).

194 Our data set was collected by five different survey teams, one for each of the three  
195 original surveys: Forillon: Majcen (1981); Mont-Mégantic: Marcotte & Grandtner

196 (1974); Gatineau: Chartrand (1976), one for the recent Mont-Mégantic survey: Savage &  
197 Vellend (2015), and one for the recent Forillon and Gatineau surveys (A. Becker-  
198 Scarpitta and assistants). Most plants were identified to the species level in the same way  
199 across surveys, such that the only harmonization step for these taxa was to standardize  
200 names, which may have changed over time. In many cases, however, coarser levels of  
201 taxonomic resolution (e.g., a pair of similar species not identified to the species level)  
202 were used in some but not all surveys, or the timing of different surveys created doubt  
203 about the likelihood of comparable detection abilities (e.g., for spring ephemeral plants)  
204 (see Appendix S2 for details on taxonomic standardization). In these cases, the coarser  
205 level of resolution was applied to all data sets, or species were removed to maximize  
206 comparability. We deposited all specimens identified at the species level to the Marie-  
207 Victorin herbarium (Institut de Recherche en Biologie Végétale, Université de Montréal,  
208 Canada) and all locations were entered into the GBIF database (GBIF -  
209 <https://www.gbif.org>).

## 210 **Community Temperature Index (CTI)**

211 A predicted response of communities to warming is a temporal increase in the  
212 Community Temperature Index (CTI), which we calculated for all plots in each survey.  
213 CTI was calculated as the abundance-weighted average of the Species Temperature Index  
214 (STI) across all species in a given plot. The STI for a given species is the median of the  
215 long-term (1960-2010) mean annual temperatures calculated across all known  
216 occurrences of the species (Devictor *et al.*, 2008). To calculate STIs, we compiled an  
217 independent dataset by extracting all recorded occurrences for each species in the  
218 Botanical Information and Ecology Network (BIEN - <http://bien.nceas.ucsb.edu/bien/>;

219 Enquist *et al.*, 2016) in eastern North America: 60° to 90°W; 30° to 60°N (red box of  
220 Figure 1). We excluded occurrences further west, in order to control the range of  
221 variation in precipitation (precipitation decreases markedly to the west of the deciduous  
222 forest biome). Our STIs thus reflect temperature affinities under precipitation conditions  
223 most comparable to those found in our study region. For each occurrence point, we  
224 extracted the annual mean temperature from ANUSPLIN, a model developed by Natural  
225 Resources Canada (<http://cfs.nrcan.gc.ca/projects/3> ; McKenney *et al.* 2006). The  
226 abundance-weighted version of CTI<sub>w</sub> was calculated for each plot *j* as:

227 eq1:  $CTIw_j = \sum_{i=1}^S (STI_i * RA_{ij})$

228 The STI of species *i* is weighted by the relative abundance (RA) of species *i* in plot *j* (RA  
229 = the species local abundance divided by the sum of all *S* species' abundances in that  
230 plot). Given some surprising results concerning CTI<sub>w</sub>, we also explored analyses of the  
231 unweighted version, CTI<sub>uw</sub> (median STI across species with no weighting for  
232 abundance), thus focusing on which species were present in a given plot rather than their  
233 relative abundances.

234 STI values were calculated only for species identified at the species level and with more  
235 than 50 occurrences in the BIEN database (see Appendix S3 – Species Temperature  
236 Index database). Note that compared to Savage & Vellend (2015) we used improved  
237 climate data (ANUSPLIN instead of WORLDCLIM) and updated distribution data  
238 (BIEN instead of GBIF), thus leading to the potential for different results.

239 **Statistical analysis**

240 All statistical analyses were performed in R v.3.4.2 (R Foundation for Statistical  
241 Computing 2017). To test for upward elevational shifts in species distributions at  
242 Forillon and Mont-Mégantic, we selected species occurring in at least four plots per  
243 survey in a given park. For each species in each park we calculated the average  
244 abundance-weighted elevation across occurrences. We then conducted linear mixed  
245 effect models (LMM, function *lmer*, package ‘lme4’ v.1.1-14, Bates *et al.*, 2015) testing  
246 for a fixed effect of time period on abundance-weighted mean elevation, with species as a  
247 random effect to account for the paired sampling structure of the data (each species  
248 observed in each time period).

249 We first studied the relationship between  $\alpha$ -diversity (species richness) and time using  
250 LMMs including time, elevation and the time\*elevation interaction (if significant) as  
251 fixed effects, and plot ID as a random effect. Because Gatineau has a negligible  
252 elevation gradient, we used a model for this park with only time and plot ID as a random  
253 effect. Coefficients of determination were expressed as marginal  $R^2$  ( $R^2_m$ ) and  
254 conditional  $R^2$  ( $R^2_c$ ) using the function *r.squaredGLMM*, package ‘MuMIn’ v.1.40.0  
255 (Nakagawa & Schielzeth, 2013).

256 We then explored temporal change in  $\beta$ -diversity (i.e. the variability in species  
257 composition among communities) using permutational analysis of multivariate dispersion  
258 (PERMDISP). This analysis assessed the multivariate homogeneity of group dispersions  
259 based on Bray-Curtis distances (also called percentage-difference distance), with  
260 significance testing via permutation (function *betadisper*, package ‘vegan’ v.2.4-4,  
261 Anderson *et al.*, 2006). A decrease in the multivariate distance between plots and the

262 time-specific centroid is interpreted as biotic homogenization, while an increase indicates  
263 biotic differentiation.

264 To examine changes in community composition over time, we used permutational  
265 analysis of variance (PERMANOVA, with Bray-Curtis distances) using 999 permutations  
266 (function *adonis*, package ‘vegan’) (Anderson, 2001). We used the  $R^2$  values from the  
267 PERMANOVA models as quantification of the magnitude of temporal change in order to  
268 compare among parks. We used non-metric multidimensional scaling (NMDS) with  
269 Bray-Curtis distances for visualization (function *metaMDS*, package ‘vegan’).

270 Temporal changes in the Community Temperature Index (CTI) were tested using LMMs  
271 for both weighted and unweighted versions of CTI (CTI<sub>w</sub> and CTI<sub>uw</sub>, respectively).  
272 Model structure was identical to the model for species richness. We included the  
273 interaction between time and elevation only if significant.

## 274 **Results**

### 275 **Species elevational distributions**

276 In Forillon, where there has been the least warming in recent decades, there was no  
277 significant temporal change, on average, in understory species’ elevational distributions  
278 (original survey mean =  $195.4 \pm 12.3$  (SE) m; recent =  $206.8 \pm 12.3$  m,  $t = 0.85$ ,  $p = 0.41$ ,  
279 Fig. 2a, see Appendix S4 for species-by-species data). In contrast, a significant upward  
280 elevational shift was observed at Mont-Mégantic, which has experience marked warming  
281 (original mean =  $622.1 \pm 10$  m, recent mean =  $660.94 \pm 10$  m,  $t = 4.67$ ,  $p < 0.001$ , Fig.  
282 2b). At Mont-Mégantic, on average species’ distributions have shifted 39 m towards

283 higher elevations ( $\sim 10$  m.decade<sup>-1</sup>), and this was consistent along the spatial gradient  
284 (Fig. 2b; see also Savage & Vellend 2015).

### 285 Species richness

286 At Forillon, for plot-level species richness ( $\alpha$ -diversity) we found no significant temporal  
287 change (Table 1 and 2), and the weak negative trend of richness with elevation was not  
288 significant (Fig 3d, Table 1). Across all plots we observed 18 fewer understorey species  
289 in the recent survey (65 species) than in the original survey (83 species); 27 species  
290 present in original survey were not found in the recent one, while we found 9 new species  
291 (Table 2). It is important to note that these are not likely to be gains and losses to and  
292 from the entire park, but only to and from this set of semi-permanent plots.

293 At Mont-Mégantic richness declined significantly with elevation in both time periods  
294 (original:  $t = -6.97$ ,  $p < 0.001$ ; recent:  $t = -6.91$ ,  $p < 0.001$ , Fig. 3e and Table 1). Similar  
295 numbers of understorey plant species overall were found in the recent and original  
296 surveys (92 and 87 species, respectively); 8 species from the original survey were not  
297 found, while we recorded 13 new species in recent survey (Table 2). Mont-Mégantic  
298 showed a significant increase over time in the plot-level richness of understorey species  
299 (27% increase on average, see Fig. 3b and Tables 1 and 2), and this increase was  
300 consistent across the elevational gradient (Fig. 3e).

301 Finally, in Gatineau Park, plot-level species richness increased significantly by an  
302 average of 38% ( $t = 4.14$ ,  $p < 0.001$ , Fig. 3c, Table 1 and 2). Overall, we found 20 more  
303 species in the recent survey than in the original survey. Gatineau showed the largest

304 study-wide gain in species, with 32 new species observed in the recent survey and 12  
305 species from the original survey not observed in recent one (Table 2).

### 306 **Community composition and heterogeneity**

307 At none of the three sites was there significant temporal change in  $\beta$ -diversity (Table 3).  
308 However, we observed highly significant shifts in understorey community composition  
309 for all study sites (Table 3), although in the two-dimensional NMDS ordinations the  
310 shifts appear fairly subtle (Fig. 4). The magnitude of the understorey compositional shifts  
311 ( $R^2$ ) increased from Forillon (5%) to Mont-Mégantic (8%) to Gatineau (10%) (Table 3).  
312 Appendix S5 reports the list of species frequencies and Appendix S6 shows an NMDS  
313 ordination of all plots from all parks together.

### 314 **Community temperature indices (CTI)**

315 The only significant temporal change in Community Temperature Indices (CTI<sub>w</sub>) was  
316 found at Mont-Mégantic, and the change was negative, the opposite of the predicted  
317 direction. We detected no significant changes in CTI in Forillon or Gatineau (Fig. 5 and  
318 Table 1). At Forillon, there was no significant relationship between CTI and elevation for  
319 either the original or recent survey (Fig. 5d and Table 1), nor was there any relationship  
320 for the original survey at Mont-Mégantic (Fig. 5e and Table 1). For the recent survey at  
321 Mont-Mégantic, there was a significant negative relationship between CTI<sub>w</sub> and  
322 elevation ( $t = -3.1$ ,  $p = 0.003$ , Fig. 5e and Table 1), suggesting a decrease over time in the  
323 CTI<sub>w</sub> at high elevations but not low elevations (Fig. 5e). When using the unweighted  
324 CTI (CTI<sub>uw</sub>), results were qualitatively the same for Forillon and Gatineau. At Mont-

325 Mégantic, however, we found no effect of time and a clear and significant decrease in  
326 CTIuw with elevation for both the original and recent surveys (see Appendix S7).

## 327 **Discussion**

328 Many studies at single sites have revealed temporal changes in species distributions,  
329 community composition, or phenology that are consistent with predictions based on  
330 climate warming (Lenoir *et al.*, 2009; Bertrand *et al.*, 2011; Bernhardt-Römermann *et al.*,  
331 2015; Sproull *et al.*, 2015; Ash *et al.*, 2017; Rogora *et al.*, 2018). However, with  
332 observational data (i.e., most long-term studies) it is always difficult to rule out  
333 alternative causes of temporal community change, such that comparative multi-site  
334 studies are needed to strengthen tests of the general hypothesis that biotic change over  
335 time has been influenced by climate warming (Verheyen *et al.*, 2017). In this study, we  
336 have taken advantage of a natural gradient in the degree of climate warming and of a  
337 protected area network in eastern Canada, combining three re-survey efforts totaling  
338 >100 plots to test whether greater warming has led to more marked changes in species  
339 distributions and community properties. Results were mostly consistent with our  
340 predictions, with the magnitude of biotic changes (i.e. elevational distributions, species  
341 richness, composition) most often increasing from Forillon Park in eastern Québec,  
342 where the warming trend has been relatively weak, to Mont-Mégantic where warming  
343 has been moderate, to Gatineau Park in western Québec where the warming trend has  
344 been the strongest. Results for community temperature indices were difficult to interpret,  
345 as discussed further below.

## 346 **Species' elevational distributions**



347 As predicted, species' mean elevations shifted upward at Mont-Mégantic but not  
348 Forillon. There is no elevational gradient in Gatineau Park. On average, species at Mont-  
349 Mégantic moved toward higher elevations, as predicted if species are at least partially  
350 spatially tracking their temperature optima in response to warming (Kelly & Goulden,  
351 2008; Savage & Vellend, 2015; Sproull *et al.*, 2015 ).

352 The rate of elevational shift for the understory plants at Mont-Mégantic ( $\sim 10 \text{ m.decade}^{-1}$ )  
353 is close to the global average of  $11 \text{ m.decade}^{-1}$  reported in the meta-analysis of Chen *et*  
354 *al.*, 2011), although individual studies have reported higher values (e.g.,  $\sim 22 \text{ m.decade}^{-1}$   
355 in southern California; Kelly & Goulden, 2008) and lower values (e.g., no shift in  
356 elevation in Montana; Klasner & Fagre, 2002). However, direct comparison among  
357 studies in different regions is complicated by different degrees of warming over the  
358 relevant time frames in different places. Moreover, there has been relatively few studies  
359 in North-America, making our study not only a novel general contribution to global  
360 change biology, but also a valuable regional-scale contribution to our knowledge of  
361 changes in species distributions along elevation gradients in eastern North-America.

362 Although the gradients in Forillon and Mont-Mégantic cover similar elevational ranges  
363 ( $\sim 500\text{-}600 \text{ m}$ ), the vegetation gradient is less pronounced in Forillon Park than at Mont-  
364 Mégantic. For instance, Forillon's high elevation summits are not as predictably  
365 dominated by boreal forest as they are at Mont-Mégantic. This can be seen in the weaker  
366 relationships between plot richness and CTI with elevation at Forillon contrary to Mont-  
367 Mégantic (Figs. 3d-e, 5 d-e, Appendix S7). Despite these differences, the clear absence of  
368 any shift in elevational distributions in Forillon Park is consistent with the hypothesis that

369 climate warming is the probable cause of elevational distribution shifts at Mont Mégantic  
370 (and elsewhere).

371 **Species richness, composition, and heterogeneity**

372 Since warm areas tend to have higher local plant diversity than cold areas, climate  
373 warming is predicted to increase local plant diversity in many regions (Vellend *et al.*,  
374 2017). Consistent with our prediction, there was no significant temporal change in  
375 species richness over ~40 years at Forillon but significant increases were found at Mont-  
376 Mégantic and Gatineau. Some other studies in regions that have experienced warming  
377 have also found increases of local vascular plant diversity (Klanderud & Birks, 2003;  
378 Walther *et al.*, 2005; Stockli *et al.*, 2012; Steinbauer *et al.*, 2018), although temporal  
379 changes in species richness are highly variable (Verheyen *et al.*, 2012; Vellend *et al.*,  
380 2013b).

381 We found significant temporal shifts in understorey community composition in all three  
382 parks, consistent with many studies in the literature showing species turnover through  
383 time (Magurran *et al.*, 2010; Dornelas *et al.*, 2014; Shi *et al.*, 2015). Comparisons among  
384 parks were consistent with our predictions, with the magnitude of community shifts ( $R^2$ )  
385 following the gradient of warming: Forillon < Mont-Mégantic < Gatineau. However, we  
386 found no evidence of biotic homogenization, in contrast to many studies in literature  
387 (Jurasinski & Kreyling, 2007; Keith *et al.*, 2009; Zwiener *et al.*, 2018). In fact, our earlier  
388 study of Mont Mégantic reported significant biotic homogenization (Savage & Vellend  
389 2015), and the difference with the present study appears to be largely due to differences  
390 in data processing and analysis. The raw community data were slightly different given

391 our taxonomic standardization across surveys in different parks and a few differences in  
392 which woody plants were considered part of the understory vs. canopy (e.g., *Acer*  
393 *spicatum* was included in the understory in the current study but not the earlier one).  
394 More importantly, Savage & Vellend (2015) first used a fourth-root transformation of  
395 abundance data prior to calculating Bray-Curtis differences (a recommendation in the  
396 PRIMER software; Anderson *et al.*, 2008), whereas we saw no clear justification for this  
397 in the present study. Applying the same transformation to our data revealed significant  
398 biotic homogenization for Mont Mégantic, but not for the other two parks (results not  
399 shown). This is of negligible consequence for the present study, given that we did not  
400 have strong *a priori* predictions concerning beta diversity, although it is clear that the  
401 earlier result of biotic homogenization was not robust to alternative methods of analysis.

402 All observational studies involve uncertainty in making inferences about the cause of  
403 changes over space or time. Among potentially confounding factors that can underlie  
404 temporal community changes, succession is of potentially high importance. However, our  
405 study was designed specifically to minimize strong successional dynamics. We  
406 resurveyed plots originally surveyed in mature stands that have maintained closed  
407 canopies throughout the period of study. Importantly, we have no reason to suspect that  
408 forest dynamics (driven by factors other than climate) varies among our three parks in a  
409 way that aligns with the gradient of climate warming. As such, the best supported  
410 hypothesis for explaining the temporal changes we observed along the east-west gradient  
411 is that climate warming is a key driver.

412 Resurvey studies also raise questions about the comparability of surveys in different  
413 years and in different parks (Vellend *et al.* 2013a). In this study, in order to minimize

414 differences between the six surveys, we paid close attention to taxonomic  
415 homogenization, and we consulted with botanists active in the 1970s (e.g., Colette  
416 Anseau, a collaborator of M. Grandtner's, and Z. Majcen) in order to reproduce the  
417 exact same field survey methods used in the original studies. One difference among parks  
418 we could not avoid was plot size, with smaller plots in Gatineau than in Forillon and  
419 Mégantic. It is predicted that in small communities, the importance of drift (stochastic  
420 changes in abundance) in driving community dynamics should be relatively high  
421 (Ricklefs & Lovette, 1999; Vellend, 2016). As such, all else being equal, one might have  
422 expected reduced detectability of deterministic community change over time in Gatineau,  
423 yet we found the opposite: a stronger temporal increase of  $\alpha$ -diversity and a stronger  
424 directional shift in composition. Thus, if anything, we may have underestimated the  
425 difference between Gatineau and the other parks.

#### 426 **Community temperature affinity (CTI)**

427 The results for Community Temperature Indices (CTI) diverged most strongly from our  
428 predictions. Specifically, we failed to detect any temporal increase of CTI in Gatineau,  
429 and contrary to our prediction, we found a significant decrease of CTI<sub>w</sub> for high  
430 elevation plots at Mont-Mégantic (see Fig. 5e and Table 1). This result suggests a  
431 “cooling” in terms of community affinities to temperature at high elevation, which has  
432 actually been previously observed in the European Alps (Roth *et al.*, 2014). The fact that  
433 there was no such trend when using unweighted community temperature indices (CTI<sub>uw</sub>)  
434 indicates that changes in particular species' abundances drove the result for CTI<sub>w</sub>.

435 In particular, two of the most abundant species experienced major temporal changes: (i)  
436 *Oxalis acetosella* L. (known also as *Oxalis montana* Raf.) decreased in average  
437 abundance and (ii) *Dryopteris carthusiana* (Vill.) H.P. Fuchs increased in abundance (see  
438 Appendix S8). *Oxalis acetosella* had a Species Temperature Index (STI) of 8.6 °C. This  
439 species was often found at unusually high abundance in the original surveys at Mont-  
440 Mégantic, especially at high elevation (>800 m). On average, *O. acetosella* contributed  
441 ~74% to CTIw values for high elevation plots in the original survey, while contributing  
442 only ~8% in the recent survey (see Appendix S8). Given abundance reductions at high  
443 elevation, the abundance-weighted elevation of this species declined more than any other,  
444 which represents an exception among the full set of species (*O. acetosella* is the right-  
445 most point in Fig. 2b), but which has a major effect on CTIw values. In contrast,  
446 *Dryopteris carthusiana* (STI = 7.6 °C) was not particularly abundant at high elevation in  
447 the original surveys but became very abundant in the recent surveys. The contribution of  
448 *D. carthusiana* to CTIw for plots at high elevation (>800 m) increased from 9.5% to  
449 47%. At Mont-Mégantic, *O. acetosella* is more strongly associated with high elevation  
450 forests (i.e., colder sites) than is *D. carthusiana*, and so their changes in abundance are in  
451 one sense consistent with the hypothesis that warming is a major driver of vegetation  
452 change. But since the estimated STI (using independent data) was actually higher for *O.*  
453 *acetosella* than *D. carthusiana*, the changes in abundance caused a decline in high-  
454 elevation CTIw. In sum, the high sensitivity of CTI to the dynamics of individual species,  
455 combined with uncertainty in STI values (see also below), may reduce the degree to  
456 which CTI acts as an indicator of climate warming.

457 The calculation and interpretation of CTI has several limitations. First, Species  
458 Temperature Indices (STI) are calculated based on recorded species occurrences, but for  
459 many species we have limited knowledge of geographic distributions, especially in  
460 northern regions or at high elevation. Second, the assumption that median temperature  
461 represents a species' optimum is unverified (Rodriguez-Sanchez *et al.*, 2012). As  
462 mentioned above, STI is greater (warmer) for *Oxalis* than for *Dryopteris* due to the more  
463 northern distribution of *Dryopteris*. However, in eastern North America *Oxalis* is known  
464 to be more abundant in coniferous forests at high elevation while *Dryopteris* is more  
465 widely distributed along elevation gradient. Thus, if we used data from occurrences along  
466 elevational gradients (i.e., at Mont-Mégantic), *Oxalis* would have a lower STI than  
467 *Dryopteris*. In other studies, CTI has been shown to increase as predicted by warming  
468 (Devictor *et al.*, 2008; Lindström *et al.*, 2012; Bowler *et al.*, 2015). In our study system,  
469 STIs and therefore CTIs come with considerable uncertainty.

470 In sum, we have provided empirical evidence of vegetation changes in eastern Canada  
471 that are largely consistent with the east-west gradient in warming. Explicit comparisons  
472 of community change among regions with variable climatic histories appears to be a  
473 powerful method for increasing the confidence with which biotic trends can be attributed  
474 to climate warming. Many unknowns remain, such as the functional attributes of “loser”  
475 and “winner” species, and the extent to which adaptive changes within species might also  
476 contribute to warming responses. Continuing to exploit historical data sources of all kinds  
477 can help advance global change science.

## 478 Acknowledgements

479 We thank the field and lab assistants who contributed to this project: Diane Auberson-  
480 Lavoie, Melissa Paquette, and Sara Gagnard. This work was made possible thanks to the  
481 support of park managers, especially Camille-Antoine Ouimet (Mont-Mégantic) and  
482 Daniel Sigouin (Forillon). We also thank Guillaume Blanchet, Raphael Aussenac and  
483 Joanie Van De Walle for valuable input on various aspects of this project, in particular  
484 statistical analysis. Finally, thanks to Pauline Palmas and Arnault Lalanne for providing  
485 comments on an earlier version of the manuscript. Funding was provided by the Natural  
486 Sciences and Engineering Research Council, Canada.

## 487 References

- 488 Aitken SN, Yeaman S, Holliday J a., Wang T, Curtis-McLane S (2008) Adaptation,  
489 migration or extirpation: climate change outcomes for tree populations. *Evolutionary*  
490 *Applications*, **1**, 95–111.
- 491 Anderson MJ (2001) A new method for non-parametric multivariate analysis of variance.  
492 *Austral Ecology*, **26**, 32–46.
- 493 Anderson MJ, Ellingsen KE, McArdle BH (2006) Multivariate dispersion as a measure of  
494 beta diversity. *Ecology Letters*, **9**, 683–693.
- 495 Anderson MJ, Gorley RN, Clarke KR (2008) *PERMANOVA+ for PRIMER: Guide to*  
496 *Software and Statistical Methods*. Plymouth, UK, 214 pp.
- 497 Ash JD, Givnish TJ, Waller DM (2017) Tracking lags in historical plant species' shifts in  
498 relation to regional climate change. *Global Change Biology*, **23**, 1305–1315.

- 499 Bates D, Mächler M, Bolker B, Walker S (2015) Fitting Linear Mixed-Effects Models  
500 Using lme4. *Journal of Statistical Software*, **67**, 1–48.
- 501 Becker T, Spanka J, Schröder L, Leuschner C (2016) Forty years of vegetation change in  
502 former coppice-with-standards woodlands as a result of management change and N  
503 deposition. *Applied Vegetation Science*, **20**, 304–313.
- 504 Becker-Scarpitta A, Bardat J, Lalanne A, Vellend M (2017) Long-term community  
505 change: bryophytes are more responsive than vascular plants to nitrogen deposition  
506 and warming. *Journal of Vegetation Science*, **28**, 1220–1229.
- 507 Bernhardt-Römermann M, Baeten L, Craven D et al. (2015) Drivers of temporal changes  
508 in temperate forest plant diversity vary across spatial scales. *Global Change  
509 Biology*, **21**, 3726–3737.
- 510 Bertrand R, Lenoir J, Piedallu C et al. (2011) Changes in plant community composition  
511 lag behind climate warming in lowland forests. *Nature*, **479**, 517–520.
- 512 Boisvert-Marsh L, Périé C, de Blois S (2014) Shifting with climate? Evidence for recent  
513 changes in tree species distribution at high latitudes. *Ecosphere*, **5**, art83.
- 514 Bowler DE, Haase P, Kröncke I et al. (2015) A cross-taxon analysis of the impact of  
515 climate change on abundance trends in central Europe. *Biological Conservation*,  
516 **187**, 41–50.
- 517 Braun-Blanquet J, Roussine N, Nègre R (1952) *Les Groupements Végétaux de la France  
518 Méditerranéenne*, CNRS edn (ed CNRS). Toulouse, 1-297 pp.
- 519 Chartrand N (1976) *Étude phytosociologique du stade climacique des séries de  
520 végétation dans un secteur du parc de la Gatineau*. McGill University, Macdonal



- 521 College, 109 pp.
- 522 Chen I, Hill JK, Ohlemuller R, Roy DB, Thomas CD (2011) Rapid Range Shifts of  
523 Species Associated with High Levels of Climate Warming. *Science*, **333**, 1024–  
524 1026.
- 525 Chytrý M, Tichý L, Hennekens SM, Schaminée JHJ (2014) Assessing vegetation change  
526 using vegetation-plot databases: a risky business. *Applied Vegetation Science*, **17**,  
527 32–41.
- 528 Cleland EE, Chuine I, Menzel A, Mooney HA, Schwartz MD (2007) Shifting plant  
529 phenology in response to global change. *Trends in Ecology and Evolution*, **22**, 357–  
530 365.
- 531 Devictor V, Julliard R, Couvet D, Jiguet F (2008) Birds are tracking climate warming,  
532 but not fast enough. *Proceedings of the Royal Society B: Biological Sciences*, **275**,  
533 2743–2748.
- 534 Dornelas M, Gotelli NJ, McGill B, Shimadzu H, Moyes F, Sievers C, Magurran AE  
535 (2014) Assemblage time series reveal biodiversity change but not systematic loss.  
536 *Science*, **344**, 296–299.
- 537 Enquist BJ, Condit RR, Peet RK, Schildhauer M, Thiers BM (2016) The Botanical  
538 Information and Ecology Network (BIEN): Cyberinfrastructure for an integrated  
539 botanical information network to investigate the ecological impacts of global climate  
540 change on plant biodiversity. *PeerJ*.
- 541 Frerker K, Sabo A, Waller D (2014) Long-term regional shifts in plant community  
542 composition are largely explained by local deer impact experiments. *PLoS ONE*, **9**,

543 e115843.

544 Gottfried M, Pauli H, Futschik A et al. (2012) Continent-wide response of mountain  
545 vegetation to climate change. *Nature Climate Change*, **2**, 111–115.

546 Grime JP (1977) Evidence for the existence of three primary strategies in plants and its  
547 relevance to ecological and evolutionary theory. *The American Naturalist*, **111**,  
548 1169–1194.

549 Hédl R, Bernhardt-Römermann M, Grytnes J-A, Jurasinski G, Ewald J (2017) Resurvey  
550 of historical vegetation plots: a tool for understanding long-term dynamics of plant  
551 communities. *Applied Vegetation Science*, **20**, 161–163.

552 Hermy M, Verheyen K (2007) Legacies of the past in the present-day forest biodiversity:  
553 a review of past land-use effects on forest plant species composition and diversity.  
554 *Ecological Research*, **22**, 361–371.

555 Hickling R, Roy DB, Hill JK, Fox R, Thomas CD (2006) The distributions of a wide  
556 range of taxonomic groups are expanding polewards. *Global Change Biology*, **12**,  
557 450–455.

558 Jurasinski G, Kreyling J (2007) Upward shift of alpine plants increases floristic similarity  
559 of mountain summits. *Journal of Vegetation Science*, **18**, 711–718.

560 Kampichler C, van Turnhout C a M, Devictor V, van der Jeugd HP (2012) Large-scale  
561 changes in community composition: determining land use and climate change  
562 signals. *PloS one*, **7**, e35272.

563 Kapfer J, Hédl R, Jurasinski G, Kopecký M, Schei FH, Grytnes J-A (2017) Resurveying  
564 historical vegetation data - opportunities and challenges. *Applied Vegetation*

- 565        *Science*, **20**, 164–171.
- 566    Keith S a, Newton AC, Morecroft MD, Bealey CE, Bullock JM (2009) Taxonomic  
567        homogenization of woodland plant communities over 70 years. *Proceedings of the*  
568        *Royal Society B: Biological Sciences*, **276**, 3539–3544.
- 569    Kelly AE, Goulden ML (2008) Rapid shifts in plant distribution with recent climate  
570        change. *Proceedings of the National Academy of Sciences*, **105**, 11823–11826.
- 571    Klanderud K, Birks HJB (2003) Recent increases in species richness and shifts in  
572        altitudinal distributions of Norwegian mountain plants. *The Holocene*, **13**, 1–6.
- 573    Klasner FL, Fagre DB (2002) A half century of change in Alpine treeline patterns at  
574        Glacier National Park, Montana, U.S.A. *Arctic, Antarctic, and Alpine Research*, **34**,  
575        49–56.
- 576    Kopecký M, Macek M (2015) Vegetation resurvey is robust to plot location uncertainty.  
577        *Diversity and Distributions*, **21**, 322–330.
- 578    Lenoir J, Gegout JC, Marquet PA, de Ruffray P, Brisse H (2008) A significant upward  
579        shift in plant species optimum elevation during the 20th century. *Science*, **320**,  
580        1768–1771.
- 581    Lenoir J, Gégout JC, Pierrat JC, Bontemps JD, Dhôte JF (2009) Differences between tree  
582        species seedling and adult altitudinal distribution in mountain forests during the  
583        recent warm period (1986-2006). *Ecography*, **32**, 765–777.
- 584    Lindström Å, Green M, Paulson G, Smith HG, Devictor V (2012) Rapid changes in bird  
585        community composition at multiple temporal and spatial scales in response to recent  
586        climate change. *Ecography*, **36**, 313–322.

- 587 Magurran AE, Baillie SR, Buckland ST et al. (2010) Long-term datasets in biodiversity  
588 research and monitoring: assessing change in ecological communities through time.  
589 *Trends in Ecology & Evolution*, **25**, 574–582.
- 590 Majcen Z (1981) *Les forets du parc national Forillon, Gaspésie, Québec, étude*  
591 *phytosociologique*. Université de Laval, 158 pp.
- 592 Marcotte G, Grandtner M (1974) *Étude écologique de la végétation forestière du Mont*  
593 *Mégantic*. Université de Laval, 156 pp.
- 594 McKenney DW, Pedlar JH, Papadopol P, Hutchinson MF (2006) The development of  
595 1901–2000 historical monthly climate models for Canada and the United States.  
596 *Agricultural and Forest Meteorology*, **138**, 69–81.
- 597 Menzel A, Sparks TH, Estrella N et al. (2006) European phenological response to climate  
598 change matches the warming pattern. *Global Change Biology*, **12**, 1969–1976.
- 599 Nakagawa S, Schielzeth H (2013) A general and simple method for obtaining R<sup>2</sup> from  
600 generalized linear mixed-effects models. *Methods in Ecology and Evolution*, **4**, 133–  
601 142.
- 602 Newbold T, Hudson LN, Hill SLL et al. (2015) Global effects of land use on local  
603 terrestrial biodiversity. *Nature*, **520**, 45–50.
- 604 Parmesan C, Yohe G (2003) A globally coherent fingerprint of climate change impacts  
605 across natural systems. *Nature*, **421**, 37–42.
- 606 Parmesan C, Ryrholm N, Stefanescu C et al. (1999) Poleward shifts in geographical  
607 ranges of butterfly species associated with regional warming. *Nature*, **399**, 579–583.
- 608 Pauli H, Gottfried M, Dullinger S et al. (2012) Recent Plant Diversity Changes on

- 609 Europe's Mountain Summits. *Science*, **336**, 353–355.
- 610 Pearson RG, Dawson TP (2003) Predicting the impacts of climate change on the  
611 distribution of species: are bioclimate envelope models useful? *Global Ecology and*  
612 *Biogeography*, **12**, 361–371.
- 613 Perring MP, Bernhardt-Römermann M, Baeten L et al. (2017) Global environmental  
614 change effects on plant community composition trajectories depend upon  
615 management legacies. *Global Change Biology*.
- 616 Ricklefs RE, Lovette IJ (1999) The roles of island area per se and habitat diversity in the  
617 species-area relationships of four Lesser Antillean faunal groups. *Journal of Animal*  
618 *Ecology*, **68**, 1142–1160.
- 619 Rodriguez-Sanchez F, De Frenne P, Hampe A (2012) Uncertainty in thermal tolerances  
620 and climatic debt. *Nature Climate Change*, **2**, 638–639.
- 621 Rogora M, Frate L, Carranza ML et al. (2018) Assessment of climate change effects on  
622 mountain ecosystems through a cross-site analysis in the Alps and Apennines.  
623 *Science of The Total Environment*, **624**, 1429–1442.
- 624 Rooney TP, Wiegmann SM, Rogers D a., Waller DM (2004) Biotic impoverishment and  
625 homogenization in unfragmented forest understory communities. *Conservation*  
626 *Biology*, **18**, 787–798.
- 627 Roth T, Plattner M, Amrhein V (2014) Plants, birds and butterflies: short-Term responses  
628 of species communities to climate warming vary by taxon and with altitude. *PLoS*  
629 *ONE*, **9**, e82490.
- 630 Savage J, Vellend M (2015) Elevational shifts, biotic homogenization and time lags in

- 631           vegetation change during 40 years of climate warming. *Ecography*, **38**, 546–555.
- 632 Shi Z, Sherry R, Xu X et al. (2015) Evidence for long-term shift in plant community  
633           composition under decadal experimental warming. *Journal of Ecology*, **103**, 1131–  
634           1140.
- 635 Sproull GJ, Quigley MF, Sher A, González E (2015) Long-term changes in composition,  
636           diversity and distribution patterns in four herbaceous plant communities along an  
637           elevational gradient (ed Collins B). *Journal of Vegetation Science*, **26**, 552–563.
- 638 Steinbauer MJ, Grytnes J-A, Jurasinski G et al. (2018) Accelerated increase in plant  
639           species richness on mountain summits is linked to warming. *Nature*, **556**, 231–234.
- 640 Stockli V, Wipf S, Nilsson C, Rixen C (2012) Using historical plant surveys to track  
641           biodiversity on mountain summits. *Plant Ecology and Diversity*, **4**, 415–425.
- 642 Tilman D (1989) Ecological Experimentation: Strengths and Conceptual Problems. In:  
643           *Likens G.E. (eds) Long-Term Studies in Ecology*, pp. 136–157. Springer, New York.
- 644 Urban MC (2015) Accelerating extinction risk from climate change. *Science*, **348**, 571–  
645           573.
- 646 VanDerWal J, Murphy HT, Kutt AS, Perkins GC, Bateman BL, Perry JJ, Reside AE  
647           (2012) Focus on poleward shifts in species' distribution underestimates the  
648           fingerprint of climate change. *Nature Climate Change*, **2**, 1–5.
- 649 Vanhellefont M, Baeten L, Verheyen K (2014) Relating changes in understorey  
650           diversity to environmental drivers in an ancient forest in northern Belgium. *Plant*  
651           *Ecology and Evolution*, **147**, 22–32.
- 652 Vellend M (2016) The Theory of Ecological Communities. *Monographs in Population*

653 *Biology*, **57**, 229.

654 Vellend M, Brown CD, Kharouba HM, McCune JL, Myers-Smith IH (2013a) Historical  
655 ecology: Using unconventional data sources to test for effects of global  
656 environmental change. *American Journal of Botany*, **100**, 1294–1305.

657 Vellend M, Baeten L, Myers-Smith IH et al. (2013b) Global meta-analysis reveals no net  
658 change in local-scale plant biodiversity over time. *Proceedings of the National  
659 Academy of Sciences*, **110**, 19456–19459.

660 Vellend M, Baeten L, Becker-Scarpitta A et al. (2017) Plant biodiversity change across  
661 scales during the anthropocene. *Annual Review of Plant Biology*, **68**, 563–586.

662 Verheyen K, Baeten L, De Frenne P et al. (2012) Driving factors behind the  
663 eutrophication signal in understorey plant communities of deciduous temperate  
664 forests. *Journal of Ecology*, **100**, 352–365.

665 Verheyen K, De Frenne P, Baeten L et al. (2017) Combining biodiversity resurveys  
666 across regions to advance global change research. *BioScience*, **67**, 73–83.

667 Vild O, Hédli R, Kopecký M, Szabó P, Suchánková S, Zouhar V (2016) The paradox of  
668 long-term ungulate impact: increase of plant species richness in a temperate forest.  
669 *Applied Vegetation Science*, **20**, 282–292.

670 Walther G-R, Beißner S, Burga C a. (2005) Trends in the upward shift of alpine plants.  
671 *Journal of Vegetation Science*, **16**, 541–548.

672 Wang Y, Wen S, Farnon Ellwood MD, Miller AD, Chu C (2017) Temporal effects of  
673 disturbance on community composition in simulated stage-structured plant  
674 communities. *Ecology and Evolution*, **8**, 120–127.

675 Yagouti A, Boulet G, Vincent L, Vescovi L, Mekis É (2008) Observed changes in daily  
676 temperature and precipitation indices for southern Québec, 1960–2005. *Atmosphere-*  
677 *Ocean*, **46**, 243–256.

678 Zwiener VP, Lira-Noriega A, Grady CJ, Padial AA, Vitule JRS (2018) Climate change as  
679 a driver of biotic homogenization of woody plants in the Atlantic Forest. *Global*  
680 *Ecology and Biogeography*, **27**, 298–309.

681

682

683

## 684 **Appendices**

- 685 • Appendix S1 - Climatic trends in three regions of Québec, Canada
- 686 • Appendix S2 - Taxonomic standardization between surveys
- 687 • Appendix S3 - Species Temperature Index (STI) database
- 688 • Appendix S4 - Mean abundance-weighted elevation and number of occurrences  
689 per species per survey in Forillon and Mont-Mégantic
- 690 • Appendix S5 - Species occurrences per survey (number of plots where species  
691 were recorded)
- 692 • Appendix S6 - Global ordination of community composition for all three parks in  
693 both time-periods
- 694 • Appendix S7 - Results for unweighted Community Temperature Indices (CTI<sub>uw</sub>)



- 695       • Appendix S8 - Individual species contributions to Community Temperature
- 696       Indices (CTI<sub>w</sub>) for high elevation plots at Mont-Mégantic

697 Table 1 – Results of linear mixed models (LMMs) predicting species richness and  
 698 community temperature indices (CTI<sub>w</sub>). R<sup>2</sup><sub>m</sub> is the marginal R<sup>2</sup>, measuring the  
 699 proportion of variance explained by fixed effects; R<sup>2</sup><sub>c</sub> is the conditional R<sup>2</sup>, giving the  
 700 proportion of variance explained by both fixed and random effects.

|                                                         | Effect           | F value | df | Pr(> t )         | R <sup>2</sup> <sub>m</sub> | R <sup>2</sup> <sub>c</sub> |
|---------------------------------------------------------|------------------|---------|----|------------------|-----------------------------|-----------------------------|
| <b>a) Plot richness (α diversity)</b>                   |                  |         |    |                  |                             |                             |
| <b>Forillon</b>                                         | Time             | 3.67    | 48 | 0.06             | 0.04                        | 0.41                        |
|                                                         | Elevation        | 1.25    | 47 | 0.27             |                             |                             |
| <b>Mégantic</b>                                         | Time             | 26.77   | 47 | <b>&lt;0.001</b> | 0.54                        | 0.74                        |
|                                                         | Elevation        | 68.14   | 46 | <b>&lt;0.001</b> |                             |                             |
| <b>Gatineau</b>                                         | Time             | 17.15   | 27 | <b>&lt;0.001</b> | 0.16                        | 0.50                        |
| <b>b) Community Temperature Index (CTI<sub>w</sub>)</b> |                  |         |    |                  |                             |                             |
| <b>Forillon</b>                                         | Time             | 0.01    | 47 | 0.74             | 0.01                        | 0.16                        |
|                                                         | Elevation        | 0.57    | 48 | 0.46             |                             |                             |
| <b>Mégantic</b>                                         | Time             | 7.02    | 46 | <b>0.01</b>      | 0.13                        | 0.36                        |
|                                                         | Elevation        | 4.57    | 46 | <b>0.04</b>      |                             |                             |
|                                                         | Time * Elevation | 9.57    | 46 | <b>0.003</b>     |                             |                             |
| <b>Gatineau</b>                                         | Time             | 1.49    | 27 | 0.23             | 0.01                        | 0.56                        |

701

702

703 Table 2– Temporal changes in total species numbers and plot-level species richness ( $\alpha$ -  
 704 diversity). The total number of species observed across all plots is broken down into  
 705 those shared, lost, or gained between the original and recent surveys. For plot-level  
 706 richness, means  $\pm$  SE are reported. Shading indicates significant statistical differences  
 707 ( $p < 0.05$ , see Table 1 for statistical tests)

|                 | <b>Total species number</b> |        |        |        |        | <b><math>\alpha</math>-diversity</b> |                |
|-----------------|-----------------------------|--------|--------|--------|--------|--------------------------------------|----------------|
|                 | Original                    | Recent | Shared | Losted | Gained | Original                             | Recent         |
| <b>Forillon</b> | 83                          | 65     | 56     | 27     | 9      | 18.2 $\pm$ 1                         | 16.4 $\pm$ 0.8 |
| <b>Mégantic</b> | 87                          | 92     | 79     | 8      | 13     | 21.2 $\pm$ 1.5                       | 27.0 $\pm$ 1.5 |
| <b>Gatineau</b> | 70                          | 90     | 58     | 12     | 32     | 11.6 $\pm$ 0.8                       | 15.9 $\pm$ 0.8 |

708

709

710 Table 3 – Tests for temporal shifts in  $\beta$ -diversity (PERMDISP) and community  
 711 composition (PERMANOVA) of understorey communities between original and  
 712 recent surveys.  $\beta$ -diversity is the mean distance between each plot and the time-  
 713 specific centroid in multivariate space (Bray-Curtis distances).  $R^2$  is the proportion of  
 714 variation in community composition explained by time. Statistical significance levels  
 715 were calculated with 999 permutations.

|                 | <b><math>\beta</math>-diversity</b> |        |      |        | <b>Community composition</b> |      |        |
|-----------------|-------------------------------------|--------|------|--------|------------------------------|------|--------|
|                 | Original                            | Recent | F    | Pr(<F) | $R^2$                        | F    | Pr(<F) |
| <b>Forillon</b> | 0.50                                | 0.54   | 3.53 | 0.06   | 0.052                        | 5.26 | <0.001 |
| <b>Mégantic</b> | 0.53                                | 0.50   | 2.56 | 0.11   | 0.076                        | 7.78 | <0.001 |
| <b>Gatineau</b> | 0.56                                | 0.60   | 3.52 | 0.70   | 0.096                        | 5.71 | <0.001 |

716

717

718

719 Figure 1: Location of study sites in (a) Canada and (b) the Province of Québec. The red  
720 box in (a) shows the area used for extraction of species occurrences in the calculation  
721 of Species Temperature Indices (STI): 60°-90°W; 30°- 60°N

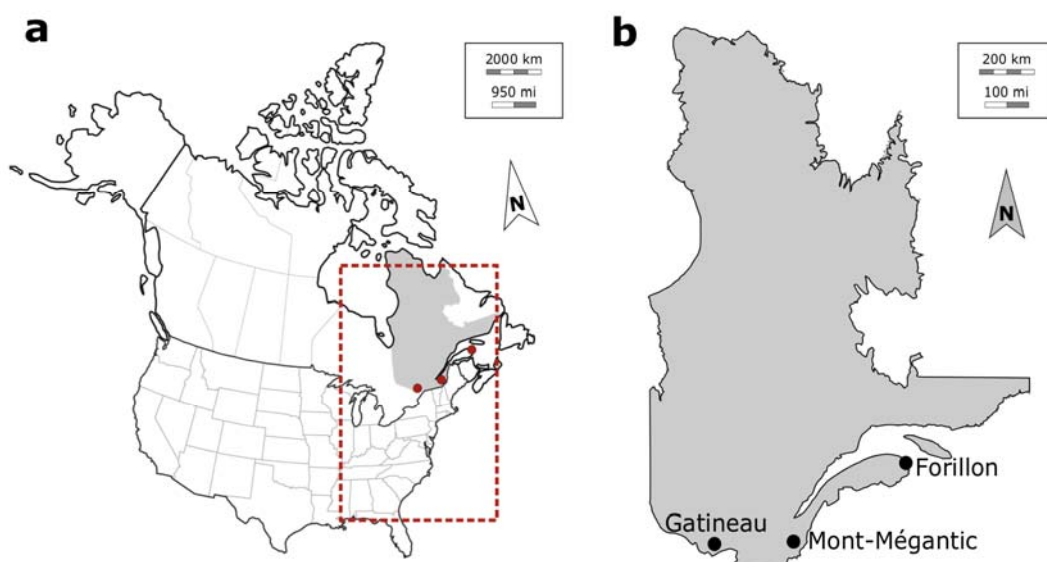

722

723

724 Figure 2 – Changes over time in species’ elevational distributions at (a) Forillon, n=35  
725 species,  $F=0.70$ ,  $p=0.41$  – no significant shift in elevation, and (b) Mont Mégantic,  
726 n=50 species,  $F=22.72$ ,  $p<0.001$  – significant upward shift in elevation. The diagonal  
727 line (1:1) represents no elevational change over time. Each point represents one  
728 species (occurring in minimum four plots per survey); see Appendix S4 for data.

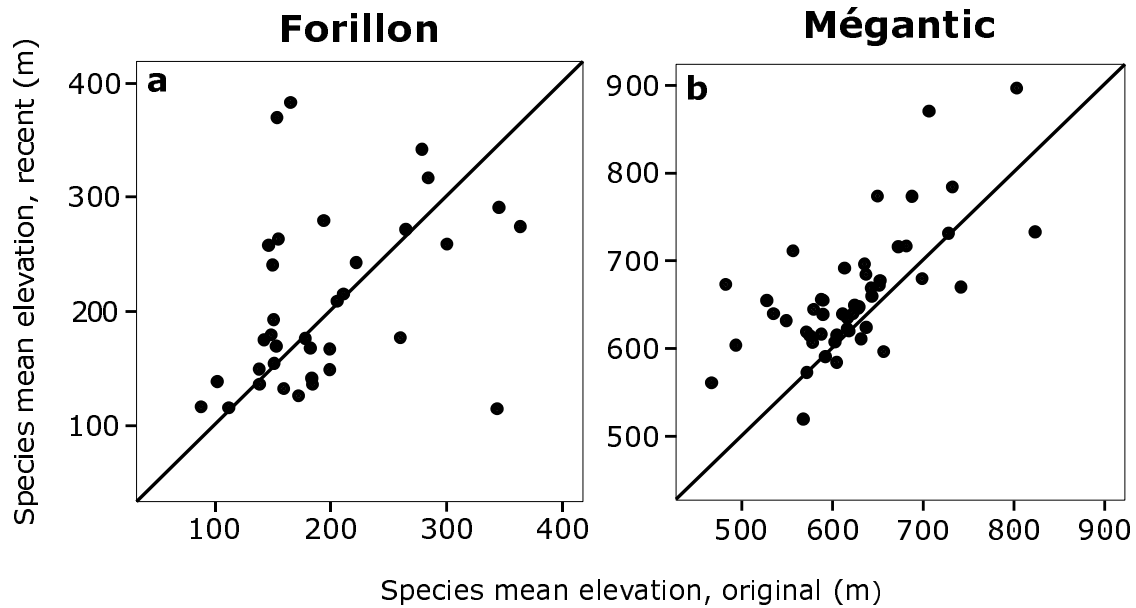

729

730 Figure 0 – Temporal changes in understorey species richness. (a-c) Box plots of original  
731 and recent species richness per plot in the three parks. (d-e) Linear relationships  
732 between species richness and elevation in the original and recent surveys at Forillon  
733 (n=49\*2 plots, no significant relationship for either original or recent surveys, see  
734 Table 1), and Mont-Mégantic (n=48\*2 plots, significant relationship for both original  
735 and recent surveys, see Table 1). The colored polygons around each regression line  
736 represent 95% confidence intervals. \*\*\* p<0.001

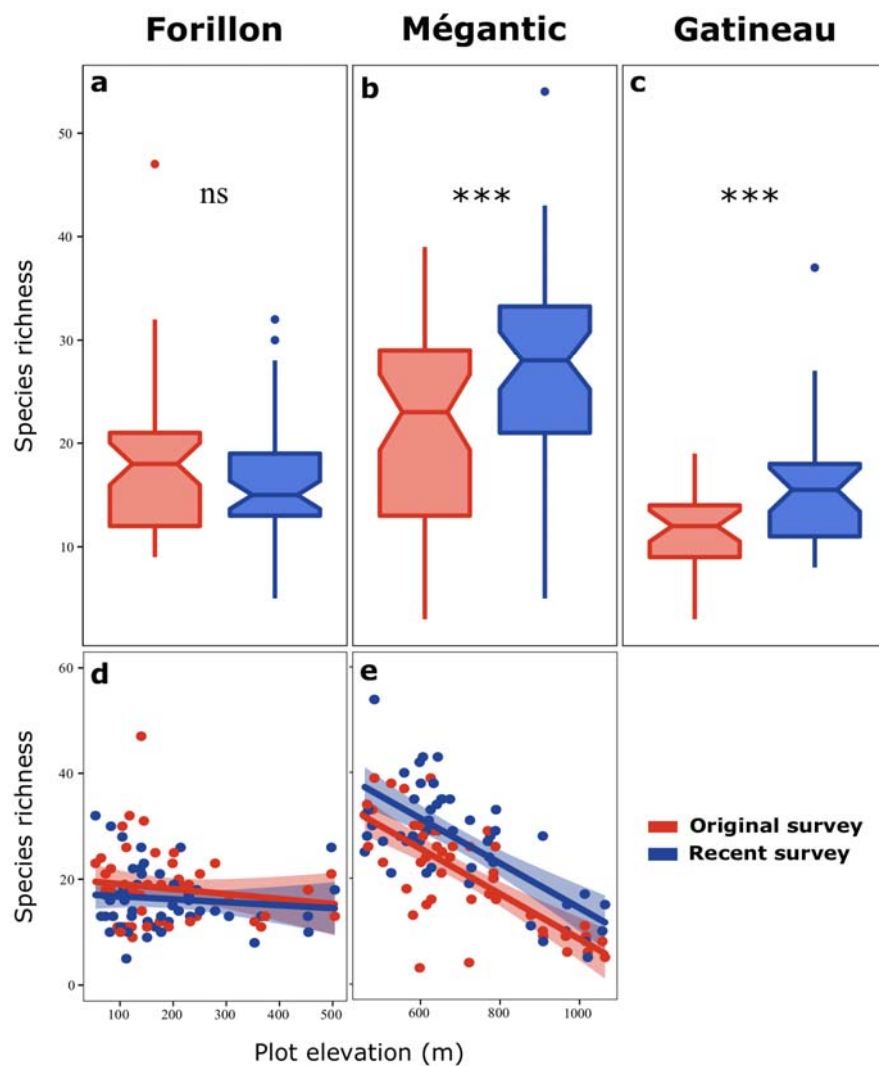

737

738 Figure 4 – Non-metric multidimensional scaling (NMDS) ordinations of understorey  
739 communities across time for (a) Forillon, stress = 0.94; (b) Mont-Mégantic,  
740 stress=0.97 and (c) Gatineau, stress=0.97. Each point represents a survey plot, and  
741 colors refer to the time-period of surveys (red: original survey; blue: recent survey).  
742 Ellipses show 75% confidence limits for each time-period. We used two dimensions  
743 and Bray-Curtis distances. For a single ordination with species names see Appendix  
744 S6.

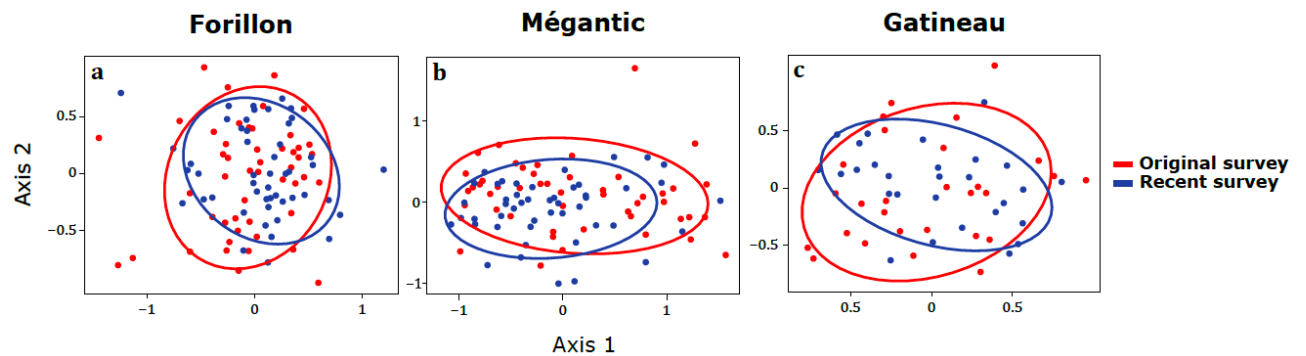

745

746

747 Figure 5 – Community Temperature Indices (CTIw) during the two-time periods and  
748 across the elevational gradient. (a-c) Abundance-weighted indices (CTIw) at Forillon,  
749 Mont-Mégantic, and Gatineau, with the 1:1 line indicating no temporal change  
750 between two times. (d-e) Relationships between CTIw and elevation for each time  
751 period at Forillon and Mont-Mégantic. Red and blue illustrate original and recent  
752 surveys, respectively. Each point is a plot in all panels.

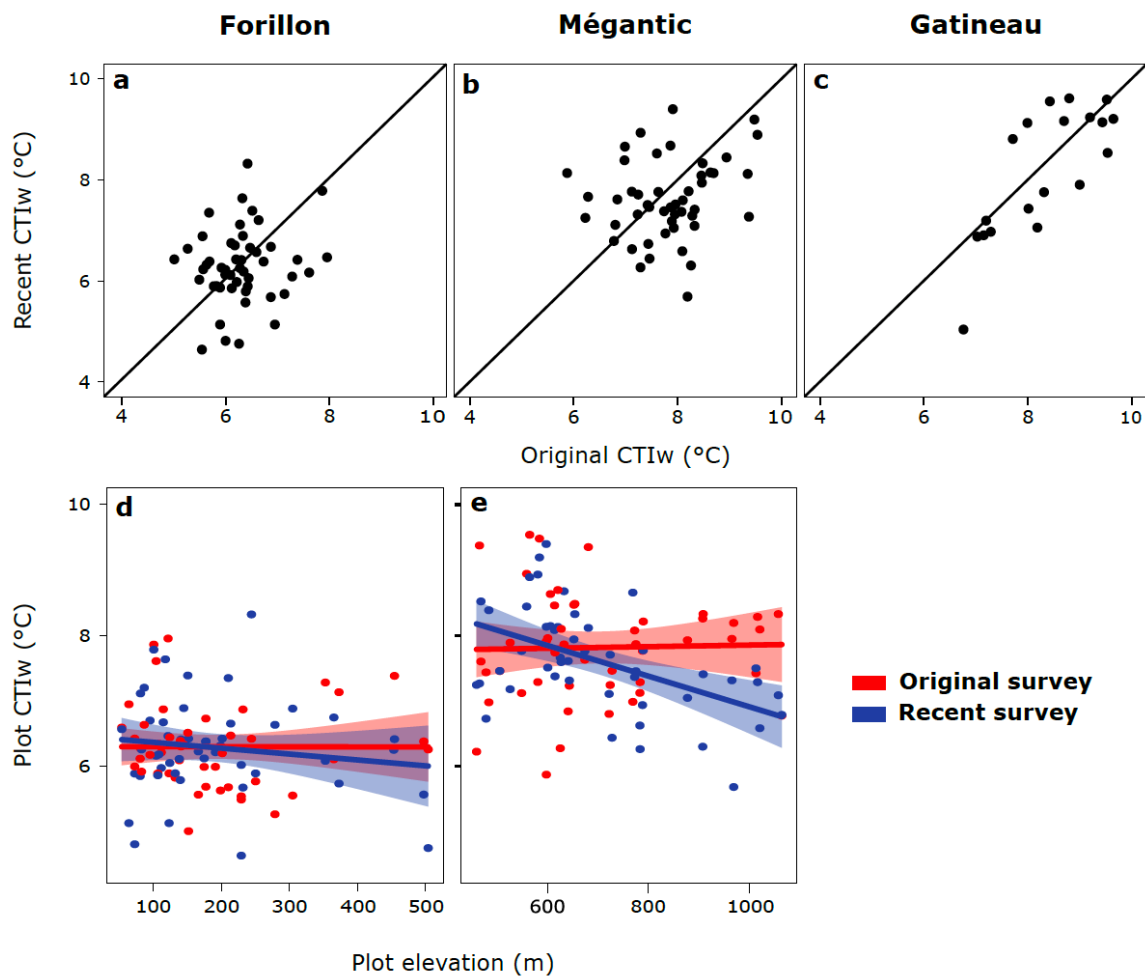

753

754
